# Supplementary material
Source: publisher figshare collection journal article supplement (https://karger.figshare.com/ndownloader/files/15167387)
Supplement: Supplementary file 1 [file 15167387]

Box 2: Classification of histiocytoses and neoplasms of the macrophage-dendritic cell lineage*

- L Group: Langerhans Related Group
  - Langerhans cell histiocytosis single system
  - Langerhans cell histiocytosis multiple system
  - Erdheim-Chester disease
- C Group: Cutaneous non-Langerhans Group
  - Juvenile and adult xanthogranuloma
  - Necrobiotic xanthogranuloma
  - Cutaneous Rosai-Dorfman disease (RDD)
- M Group: Malignant Histiocytoses
  - Histiocytic sarcoma
  - Dendritic cell sarcomas (interdigitating, follicular, indeterminate)
  - Disseminated juvenile xanthogranuloma
- R Group: Rosai-Dorfman disease
  - Nodal or extranodal RDD, with or without IgG4 syndrome
  - Neoplasia or immune-disease associated
- H Group: Haemophagocytic Lymphohistiocytosis and Macrophage Activation Syndrome
  - Primary
  - Secondary (infections, autoimmune diseases, malignancy-associated)

*modified from Emile et al. 2016.
